# Supplementary material for: Porous nickel electrodes with controlled texture for the hydrogen evolution reaction and sodium borohydride electrooxidation
Source: Royal Society of Chemistry journal article supplement (doi:10.1039/d0ce00344a), 2020-01-01
Supplement: d0ce00344a1.pdf [file d0ce00344a1.pdf]

## Supporting Information for

### **Porous Nickel Electrodes with Controlled Texture for Hydrogen Evolution Reaction and Sodium Borohydride Electrooxidation**

Chuanlan Xu<sup>a</sup>, Peng Chen<sup>a</sup>, Bingbing Hu<sup>a</sup>, Qin Xiang<sup>b</sup>, Yuan Cen<sup>a</sup>, Bihao Hu<sup>a</sup>, Lijun Liu<sup>a</sup>, Yuping Liu<sup>a</sup>, Danmei Yu<sup>\*a</sup>, and Changguo Chen<sup>\*a</sup>

<sup>a</sup> *College of Chemistry and Chemical Engineering, Chongqing University, Chongqing, 401331, China*

<sup>b</sup> *School for Materials Science and Engineering, Huazhong University of Science and Technology, Wuhan, 430074, China*

### **Corresponding Authors**

\* Tel.: +86 15320437269. E-mail: yudanmei-1@163.com.

\* Tel.: +86 13608357956. E-mail: cgchen@cqu.edu.cn.

### **Notes**

The authors declare no competing financial interest.

5 pages: page I - V

6 figures: figure S1-S6

1 table: table S1

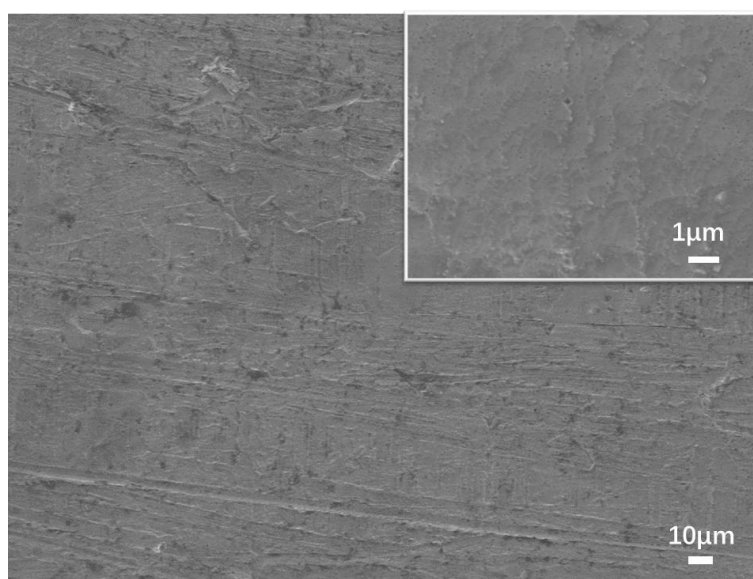

**Figure S1.** SEM image of the Ni substrate.

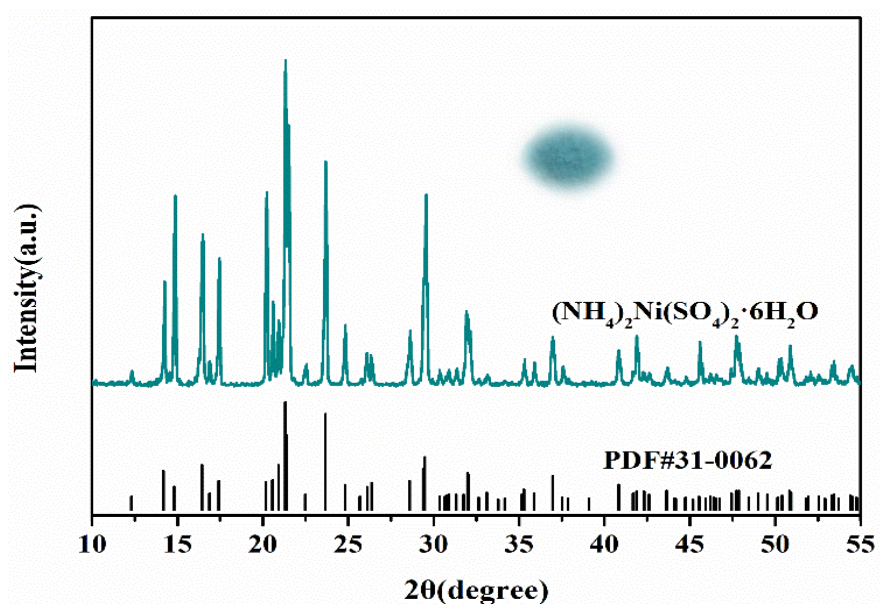

**Figure S2.** XRD pattern of the precipitates in solution when  $(\text{NH}_4)_2\text{SO}_4$  concentration over 0.5M.

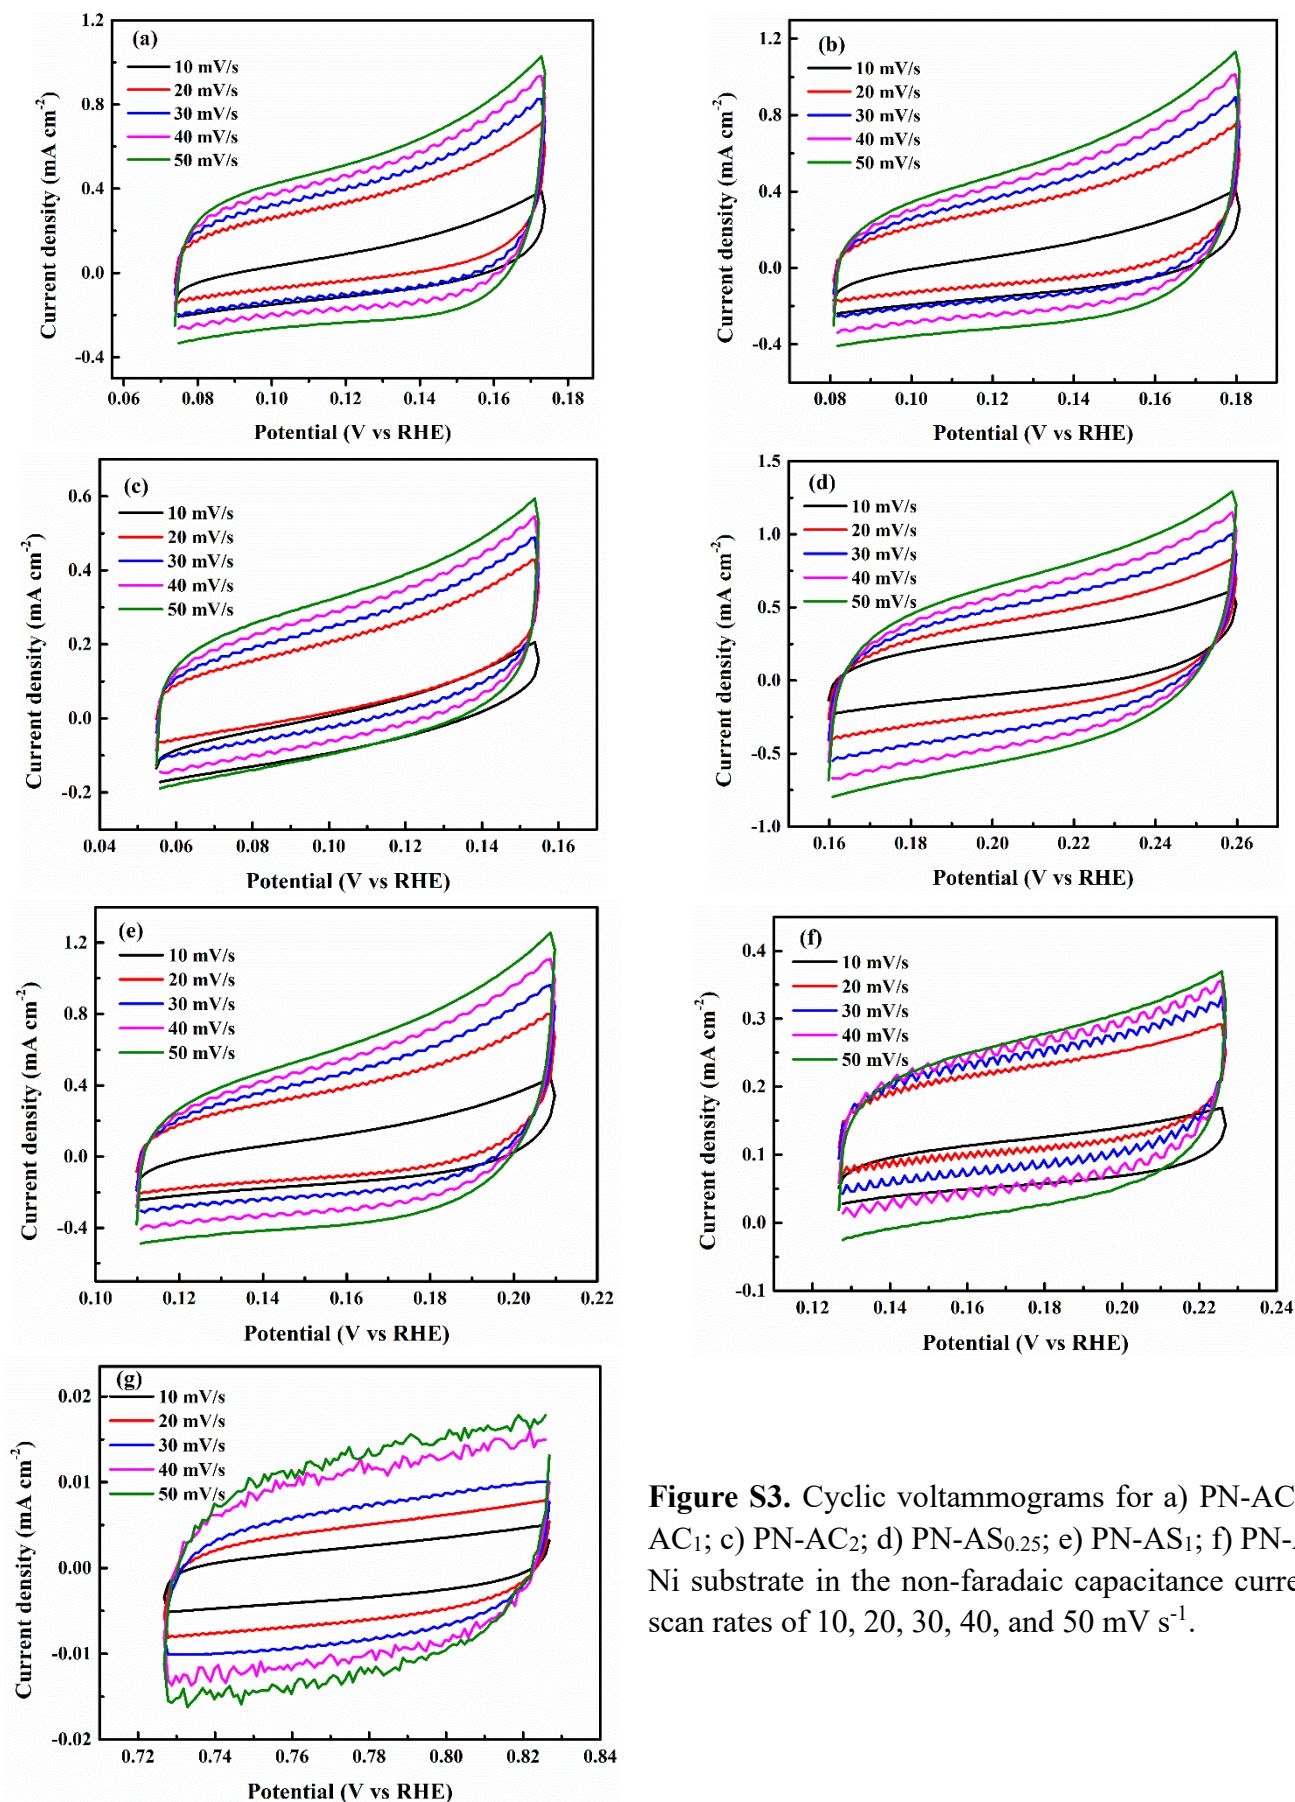

**Figure S3.** Cyclic voltammograms for a) PN-AC<sub>0.25</sub>; b) PN-AC<sub>1</sub>; c) PN-AC<sub>2</sub>; d) PN-AS<sub>0.25</sub>; e) PN-AS<sub>1</sub>; f) PN-AS<sub>2</sub>; and g) Ni substrate in the non-faradaic capacitance current range at scan rates of 10, 20, 30, 40, and 50  $\text{mV s}^{-1}$ .



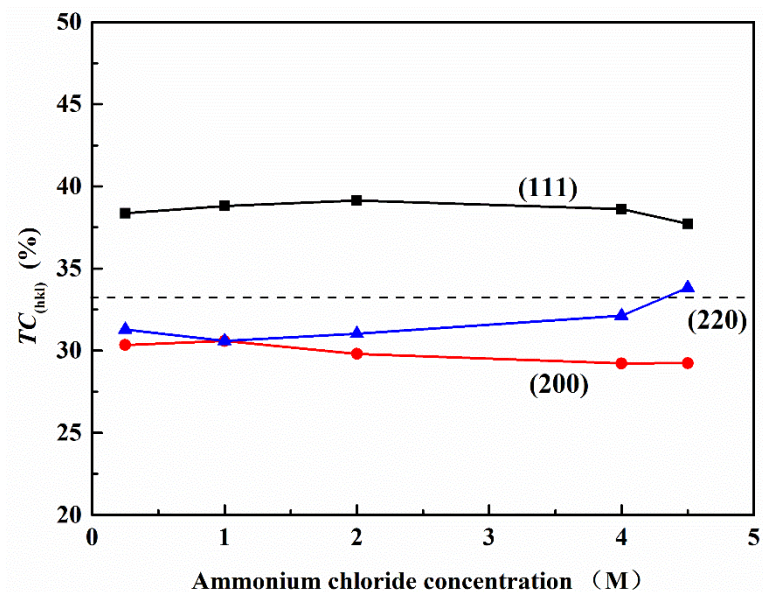

**Figure S4.** Relationship between texture of porous Ni electrodes and concentration of  $\text{NH}_4\text{Cl}$ .

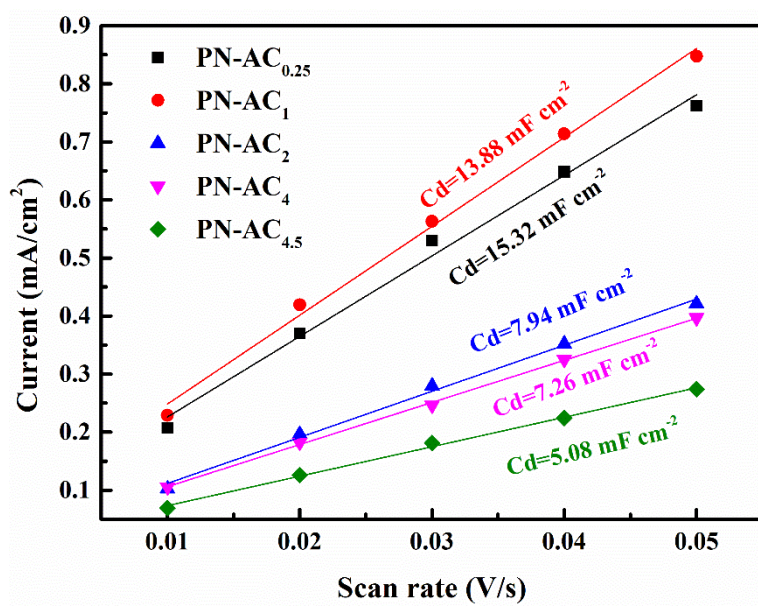

**Figure S5.** Corresponding capacitive currents at the specific potential vs  $\text{Hg}/\text{HgO}$  as a function of scan rate (10, 20, 30, 40, and  $50 \text{ mV s}^{-1}$ ).

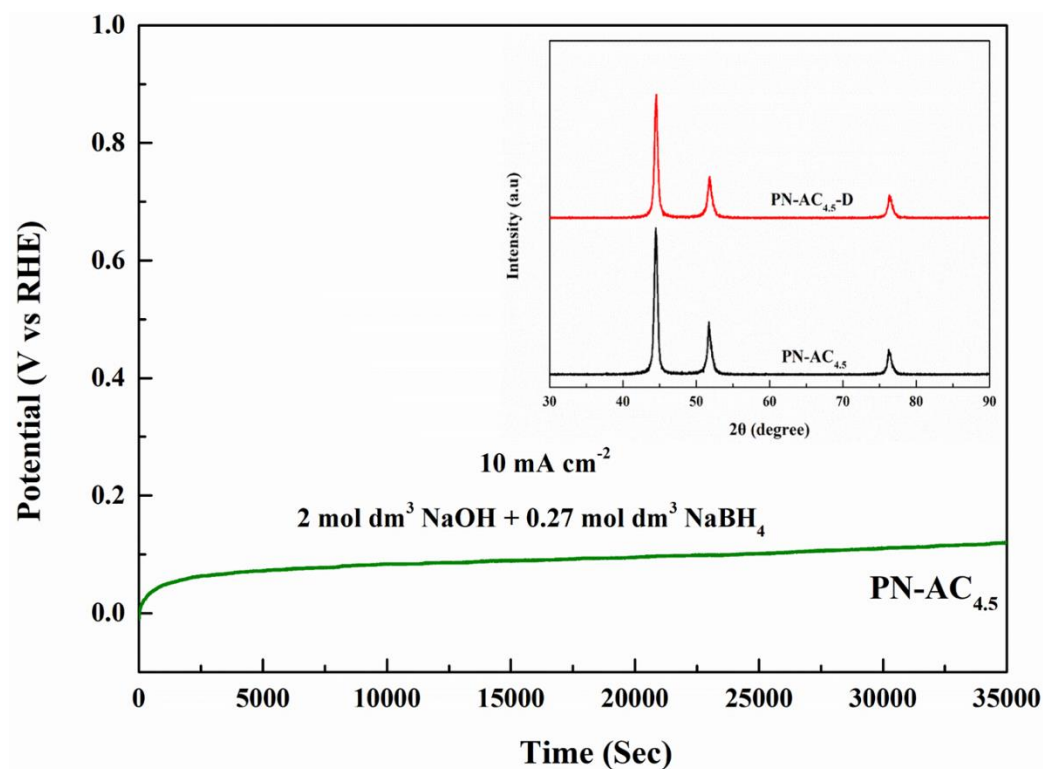

**Figure S6.** Chronopotentiometry curves of  $\text{NaBH}_4$  oxidation on  $\text{PN-AC}_{4.5}$  at 25 °C in 0.27 M  $\text{NaBH}_4$  + 2 M  $\text{NaOH}$  solution. Embedded: XRD patterns of  $\text{PN-AC}_{4.5}$  and  $\text{PN-AC}_{4.5}\text{-D}$  ( $\text{PN-AC}_{4.5}$  after the long-stability test).

**Table S1.** The  $C_{dl}$  and ECSA of Ni electrodes.

|                       | $C_{dl}$ (mF cm <sup>-2</sup> ) | ECSA (cm <sup>2</sup> ) |
|-----------------------|---------------------------------|-------------------------|
| PN-AC <sub>0.25</sub> | 13.88                           | 555.2                   |
| PN-AC <sub>1</sub>    | 15.32                           | 612.8                   |
| PN-AC <sub>2</sub>    | 7.94                            | 317.6                   |
| PN-AS <sub>0.25</sub> | 21.01                           | 840.4                   |
| PN-AS <sub>1</sub>    | 18.06                           | 722.4                   |
| PN-AS <sub>2</sub>    | 4.55                            | 182                     |
| Ni substrate          | 0.49                            | 19.6                    |
